# Supplementary material for: Ex situ evaluation of the composition of protein corona of intravenously injected superparamagnetic nanoparticles in rats
Source: Royal Society of Chemistry journal article supplement (doi:10.1039/c4nr02793k), 2014-01-01
Supplement: c4nr02793k1.pdf [file c4nr02793k1.pdf]

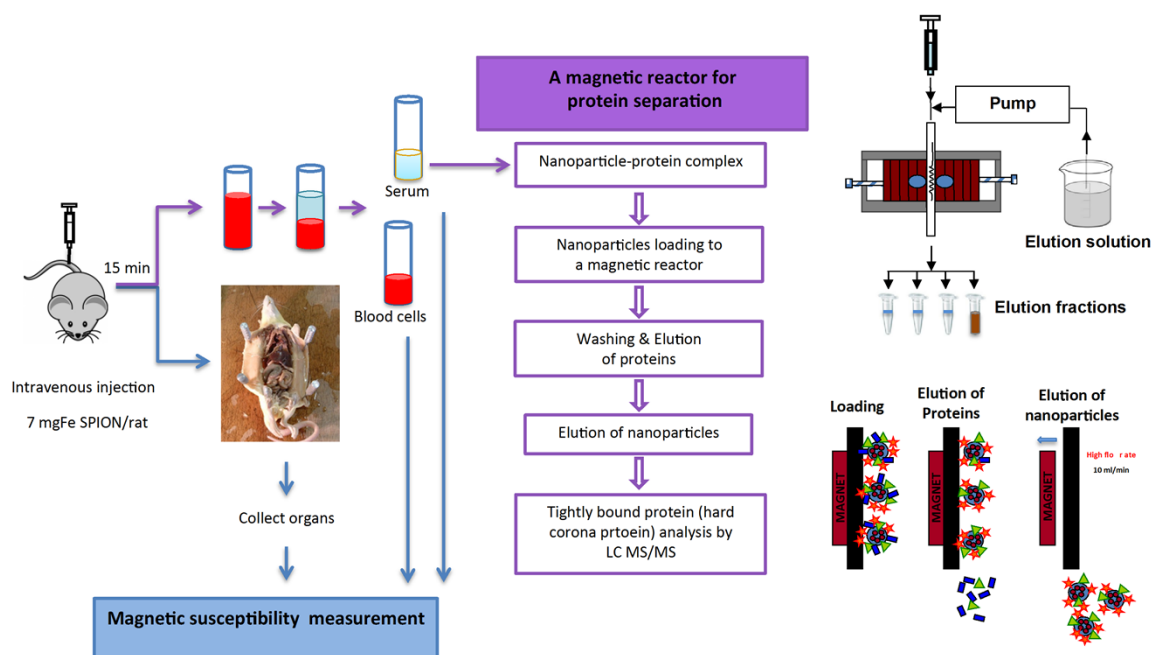

**Figure S1** Schematic representation of a procedure for organs and serum collection and protein separation by a magnetic reactor.

For more information about the magnetic reactor:

B. Steitz, J. Salaklang, A. Finka, C. O'Neil, H. Hofmann and A. Petri-Fink, *Bioconjugate Chem.*, 2007, 18(5), 1684.

J. Salaklang, Thèse Ecole polytechnique fédérale de Lausanne EPFL, no 4539 (2009), Programme doctoral Sciences et Génie des matériaux, Faculté des sciences et techniques de l'ingénieur STI, Institut des matériaux IMX (Laboratoire de technologie des poudres LTP) Dir Heinrich Hofmann, Alke Susanne Fink, EPFL, 2009

**Table S1** List of all prominent proteins identified in the hard corona associated with positively charged SPIONs *in vivo*.

| Accession       | Mass (Da) | Description                    | -10lgP   |          | # Spectra |          | NpSpC    |          | Average NpSpC | SD (±) |
|-----------------|-----------|--------------------------------|----------|----------|-----------|----------|----------|----------|---------------|--------|
|                 |           |                                | Sample 1 | Sample 2 | Sample 1  | Sample 2 | Sample 1 | Sample 2 |               |        |
| P04937 FINC_RAT | 272509    | Fibronectin                    | 141.63   | 148.47   | 7         | 6        | 0.77     | 0.65     | 0.71          | 0.09   |
| P01026 CO3_RAT  | 186459    | Complement C3                  | 323.59   | 374.3    | 34        | 34       | 5.47     | 5.38     | 5.43          | 0.06   |
| Q63041 A1M_RAT  | 167124    | Alpha-1-macroglobulin          | 77.99    | 87.56    | 2         | 2        | 0.36     | 0.35     | 0.36          | 0.00   |
| Q03626 MUG1_RAT | 165325    | Murinoglobulin-1               | 56.53    | 62.56    | 1         | 1        | 0.18     | 0.18     | 0.18          | 0.00   |
| P14046 A1I3_RAT | 163772    | Alpha-1-inhibitor 3            | 56.53    | 62.56    | 1         | 1        | 0.18     | 0.18     | 0.18          | 0.00   |
| Q6IE52 MUG2_RAT | 161588    | Murinoglobulin-2               | 56.53    | 62.56    | 1         | 1        | 0.19     | 0.18     | 0.18          | 0.00   |
| P23562 B3AT_RAT | 103173    | Band 3 anion transport protein | 51.21    | 48.25    | 2         | 2        | 0.58     | 0.57     | 0.58          | 0.01   |
| P06399 FIBA_RAT | 86686     | Fibrinogen alpha chain         | 247.12   | 275.51   | 23        | 23       | 7.96     | 7.83     | 7.90          | 0.09   |

|                  |       |                                |        |        |   |   |      |      |      |      |
|------------------|-------|--------------------------------|--------|--------|---|---|------|------|------|------|
| P84903 STIM1_RAT | 77449 | Stromal interaction molecule 1 | ND     | 26.56  | 0 | 1 | 0.00 | 0.38 | 0.19 | 0.27 |
| P02770 ALBU_RAT  | 68731 | Serum albumin                  | 132.21 | 139.59 | 6 | 5 | 2.62 | 2.15 | 2.38 | 0.33 |
| Q62894 ECM1_RAT  | 63249 | Extracellular matrix protein 1 | 51.59  | 59.36  | 1 | 1 | 0.47 | 0.47 | 0.47 | 0.01 |
| Q62930 CO9_RAT   | 62281 | Complement component C9        | 69.78  | 74.88  | 1 | 1 | 0.48 | 0.47 | 0.48 | 0.01 |
| P82450 SIAE_RAT  | 60466 | Sialate O-acetyltransferase    | 33.11  | 34.09  | 1 | 1 | 0.50 | 0.49 | 0.49 | 0.01 |
| Q9EPH1 A1BG_RAT  | 56479 | Alpha-1B-glycoprotein          | 34.87  | 40.27  | 1 | 1 | 0.53 | 0.52 | 0.53 | 0.01 |
| Q63207 FA10_RAT  | 54265 | Coagulation factor X           | 107.53 | 125.53 | 4 | 4 | 2.21 | 2.18 | 2.19 | 0.03 |
| P14480 FIBB_RAT  | 54235 | Fibrinogen beta chain          | 163.66 | 186.87 | 5 | 5 | 2.77 | 2.72 | 2.74 | 0.03 |
| P02680 FIBG_RAT  | 50633 | Fibrinogen gamma chain         | 102.39 | 99.37  | 3 | 3 | 1.78 | 1.75 | 1.76 | 0.02 |

|                  |       |                                                                     |        |        |    |    |       |      |      |      |
|------------------|-------|---------------------------------------------------------------------|--------|--------|----|----|-------|------|------|------|
| Q8K3U6 FA7_RAT   | 50399 | Coagulation factor VII                                              | 49.75  | 64.63  | 1  | 1  | 0.60  | 0.59 | 0.59 | 0.01 |
| Q66H16 FSIP1_RAT | 49568 | Fibrous sheath-interacting protein 1                                | ND     | 22.71  | 0  | 1  | 0.00  | 0.60 | 0.30 | 0.42 |
| Q64536 PDK2_RAT  | 46106 | [Pyruvate dehydrogenase [lipoamide]] kinase isozyme 2_mitochondrial | ND     | 23.2   | 0  | 1  | 0.00  | 0.64 | 0.32 | 0.45 |
| Q4FZT0 STML2_RAT | 38414 | Stomatin-like protein 2                                             | ND     | 24.79  | 0  | 1  | 0.00  | 0.77 | 0.38 | 0.54 |
| P24090 FETUA_RAT | 37982 | Alpha-2-HS-glycoprotein                                             | 105.49 | 119.12 | 2  | 2  | 1.58  | 1.55 | 1.57 | 0.02 |
| P04797 G3P_RAT   | 35828 | Glyceraldehyde-3-phosphate dehydrogenase                            | 33.45  | ND     | 1  | 0  | 0.84  | 0.00 | 0.42 | 0.59 |
| P02650 APOE_RAT  | 35753 | Apolipoprotein E                                                    | 216.06 | 239.61 | 12 | 12 | 10.07 | 9.91 | 9.99 | 0.12 |
| P08721 OSTP_RAT  | 34963 | Osteopontin                                                         | 83.88  | 85.73  | 2  | 2  | 1.72  | 1.69 | 1.70 | 0.02 |
| P04639 APOA1_RAT | 30062 | Apolipoprotein A-I                                                  | 60.41  | 76.14  | 1  | 1  | 1.00  | 0.98 | 0.99 | 0.01 |

|                  |       |                              |        |        |   |   |       |       |       |      |
|------------------|-------|------------------------------|--------|--------|---|---|-------|-------|-------|------|
| P00762 TRY1_RAT  | 25959 | Anionic trypsin-1            | 47.18  | 56.69  | 1 | 1 | 1.16  | 1.14  | 1.15  | 0.01 |
| Q62740 SPP24_RAT | 23170 | Secreted phosphoprotein 24   | 116.62 | 129.96 | 6 | 5 | 7.77  | 6.37  | 7.07  | 0.99 |
| P11517 HBB2_RAT  | 15982 | Hemoglobin subunit beta-2    | 204.32 | 237.69 | 9 | 9 | 16.90 | 16.62 | 16.76 | 0.20 |
| P02091 HBB1_RAT  | 15979 | Hemoglobin subunit beta-1    | 171.83 | 192.93 | 7 | 7 | 13.15 | 12.93 | 13.04 | 0.16 |
| P01946 HBA_RAT   | 15329 | Hemoglobin subunit alpha-1/2 | 156.64 | 176.93 | 8 | 9 | 15.66 | 17.33 | 16.50 | 1.18 |
| P08494 MGP_RAT   | 12037 | Matrix Gla protein           | 70.71  | 78.45  | 1 | 1 | 2.49  | 2.45  | 2.47  | 0.03 |

**Table S2** List of all prominent proteins identified in the hard corona associated with neutral SPIONs *in vivo*.

| Accession        | Mass (Da) | Protein                                                  | -10lgP   |          | # Spectra |          | NpSpC    |          | Average NpSpC | SD (±) |
|------------------|-----------|----------------------------------------------------------|----------|----------|-----------|----------|----------|----------|---------------|--------|
|                  |           |                                                          | Sample 1 | Sample 2 | Sample 1  | Sample 2 | Sample 1 | Sample 2 |               |        |
| P04937 FINC_RAT  | 272509    | Fibronectin                                              | 307.38   | 252.2    | 24        | 24       | 1.50     | 1.75     | 1.63          | 0.18   |
| Q9R095 SPEF2_RAT | 208157    | Sperm flagellar protein 2                                | 30.25    | #N/A     | 1         | 0        | 0.08     | 0.00     | 0.04          | 0.06   |
| P08649 CO4_RAT   | 192162    | Complement C4                                            | 38.59    | #N/A     | 1         | 0        | 0.09     | 0.00     | 0.04          | 0.06   |
| Q00918 LTBP1_RAT | 186598    | Latent-transforming growth factor beta-binding protein 1 | 69.95    | #N/A     | 1         | 0        | 0.09     | 0.00     | 0.05          | 0.06   |
| P01026 CO3_RAT   | 186459    | Complement C3                                            | 265.45   | 221.71   | 26        | 27       | 2.37     | 2.88     | 2.63          | 0.36   |
| Q63041 A1M_RAT   | 167124    | Alpha-1-macroglobulin                                    | 185.78   | 151.2    | 8         | 7        | 0.82     | 0.83     | 0.82          | 0.01   |
| Q03626 MUG1_RAT  | 165325    | Murinoglobulin-1                                         | 65.65    | #N/A     | 1         | 0        | 0.10     | 0.00     | 0.05          | 0.07   |
| P14046 A1I3_RAT  | 163772    | Alpha-1-inhibitor 3                                      | 65.65    | #N/A     | 1         | 0        | 0.10     | 0.00     | 0.05          | 0.07   |

|                  |        |                                                                   |        |        |    |    |      |      |      |      |
|------------------|--------|-------------------------------------------------------------------|--------|--------|----|----|------|------|------|------|
| Q6IE52 MUG2_RAT  | 161588 | Murinoglobulin-2                                                  | 65.65  | #N/A   | 1  | 0  | 0.11 | 0.00 | 0.05 | 0.07 |
| P10686 PLCG1_RAT | 148548 | 1-phosphatidylinositol 4_5-bisphosphate phosphodiesterase gamma-1 | 33.81  | #N/A   | 1  | 0  | 0.11 | 0.00 | 0.06 | 0.08 |
| P24135 PLCG2_RAT | 147735 | 1-phosphatidylinositol 4_5-bisphosphate phosphodiesterase gamma-2 | 33.81  | #N/A   | 1  | 0  | 0.12 | 0.00 | 0.06 | 0.08 |
| Q63273 GRIK5_RAT | 109276 | Glutamate receptor_ ionotropickainate 5                           | 30.25  | #N/A   | 1  | 0  | 0.16 | 0.00 | 0.08 | 0.11 |
| Q01812 GRIK4_RAT | 107223 | Glutamate receptor_ ionotropickainate 4                           | 30.25  | #N/A   | 1  | 0  | 0.16 | 0.00 | 0.08 | 0.11 |
| Q498T9 LRC8C_RAT | 92463  | Leucine-rich repeat-containing protein 8C                         | 30.25  | #N/A   | 1  | 0  | 0.18 | 0.00 | 0.09 | 0.13 |
| Q4G061 EIF3B_RAT | 90911  | Eukaryotic translation initiation factor 3 subunit B              | 30.25  | #N/A   | 1  | 0  | 0.19 | 0.00 | 0.09 | 0.13 |
| P06399 FIBA_RAT  | 86686  | Fibrinogen alpha chain                                            | 322.64 | 254.78 | 43 | 42 | 8.45 | 9.65 | 9.05 | 0.85 |
| O08619 F13A_RAT  | 82659  | Coagulation factor XIII A chain                                   | 211.75 | 179.93 | 8  | 8  | 1.65 | 1.93 | 1.79 | 0.20 |

|                  |       |                                      |        |        |   |   |      |      |      |      |
|------------------|-------|--------------------------------------|--------|--------|---|---|------|------|------|------|
| O35314 SCG1_RAT  | 77536 | Secretogranin-1                      | 57.83  | #N/A   | 1 | 0 | 0.22 | 0.00 | 0.11 | 0.16 |
| P12346 TRFE_RAT  | 76395 | Serotransferrin                      | 85.53  | 70.98  | 2 | 2 | 0.45 | 0.52 | 0.48 | 0.05 |
| P53813 PROS_RAT  | 74627 | Vitamin K-dependent protein S        | 104.7  | 88.76  | 2 | 3 | 0.46 | 0.80 | 0.63 | 0.24 |
| P08934 KNG1_RAT  | 70933 | Kininogen-1                          | 37.56  | #N/A   | 1 | 0 | 0.24 | 0.00 | 0.12 | 0.17 |
| P18292 THRB_RAT  | 70412 | Prothrombin                          | 118.88 | 99.03  | 4 | 3 | 0.97 | 0.85 | 0.91 | 0.08 |
| D3ZC96 TT39B_RAT | 70168 | Tetratricopeptide repeat protein 39B | 30.25  | #N/A   | 1 | 0 | 0.24 | 0.00 | 0.12 | 0.17 |
| P02770 ALBU_RAT  | 68731 | Serum albumin                        | 138.09 | 112    | 4 | 4 | 0.99 | 1.16 | 1.08 | 0.12 |
| Q61MF3 K2C1_RAT  | 64831 | Keratin_type II cytoskeletal 1       | 85.04  | #N/A   | 1 | 0 | 0.26 | 0.00 | 0.13 | 0.19 |
| Q62894 ECM1_RAT  | 63249 | Extracellular matrix protein 1       | 118.93 | 108.57 | 4 | 4 | 1.08 | 1.26 | 1.17 | 0.13 |
| Q62930 CO9_RAT   | 62281 | Complement component C9              | 100    | 84.03  | 2 | 2 | 0.55 | 0.64 | 0.59 | 0.07 |



|                  |       |                                 |        |        |    |    |      |      |      |      |
|------------------|-------|---------------------------------|--------|--------|----|----|------|------|------|------|
| Q6IG03 K2C73_RAT | 60387 | Keratin_type II cytoskeletal 73 | 85.04  | #N/A   | 1  | 0  | 0.28 | 0.00 | 0.14 | 0.20 |
| Q6IG01 K2C1B_RAT | 57255 | Keratin_type II cytoskeletal 1b | 85.04  | #N/A   | 1  | 0  | 0.30 | 0.00 | 0.15 | 0.21 |
| Q9EPH1 A1BG_RAT  | 56479 | Alpha-1B-glycoprotein           | 112.61 | 96.22  | 4  | 3  | 1.21 | 1.06 | 1.13 | 0.10 |
| Q63207 FA10_RAT  | 54265 | Coagulation factor X            | 197.32 | 163.31 | 12 | 13 | 3.77 | 4.77 | 4.27 | 0.71 |
| P14480 FIBB_RAT  | 54235 | Fibrinogen beta chain           | 322.28 | 252.69 | 26 | 26 | 8.16 | 9.55 | 8.86 | 0.98 |
| P05371 CLUS_RAT  | 51375 | Clusterin                       | 201.69 | 164.38 | 8  | 8  | 2.65 | 3.10 | 2.88 | 0.32 |
| P02680 FIBG_RAT  | 50633 | Fibrinogen gamma chain          | 243.88 | 205.16 | 20 | 20 | 6.73 | 7.87 | 7.30 | 0.81 |
| Q8K3U6 FA7_RAT   | 50399 | Coagulation factor VII          | 145.92 | 121.76 | 5  | 5  | 1.69 | 1.98 | 1.83 | 0.20 |
| P08932 KNT2_RAT  | 47704 | T-kininogen 2                   | 37.56  | #N/A   | 1  | 0  | 0.36 | 0.00 | 0.18 | 0.25 |
| P02651 APOA4_RAT | 44456 | Apolipoprotein A-IV             | 137.1  | 116.74 | 4  | 4  | 1.53 | 1.79 | 1.66 | 0.18 |

|                  |       |                                          |        |        |   |   |      |      |      |      |
|------------------|-------|------------------------------------------|--------|--------|---|---|------|------|------|------|
| Q9QUH3 APOA5_RAT | 41427 | Apolipoprotein A-V                       | 42.65  | #N/A   | 1 | 0 | 0.41 | 0.00 | 0.21 | 0.29 |
| Q5BJX5 F110B_RAT | 40363 | Protein FAM110B                          | 30.25  | #N/A   | 1 | 0 | 0.42 | 0.00 | 0.21 | 0.30 |
| P24090 FETUA_RAT | 37982 | Alpha-2-HS-glycoprotein                  | 135.05 | 108.1  | 4 | 4 | 1.79 | 2.10 | 1.95 | 0.22 |
| Q9WTS8 FCN1_RAT  | 36627 | Ficolin-1                                | 186.46 | 154.53 | 5 | 5 | 2.32 | 2.72 | 2.52 | 0.28 |
| P04797 G3P_RAT   | 35828 | Glyceraldehyde-3-phosphate dehydrogenase | 45.8   | #N/A   | 1 | 0 | 0.48 | 0.00 | 0.24 | 0.34 |
| P02650 APOE_RAT  | 35753 | Apolipoprotein E                         | 215.61 | 177.16 | 8 | 8 | 3.81 | 4.46 | 4.13 | 0.46 |
| P08721 OSTP_RAT  | 34963 | Osteopontin                              | 126.86 | 120.91 | 6 | 6 | 2.92 | 3.42 | 3.17 | 0.35 |
| P16296 FA9_RAT   | 31447 | Coagulation factor IX (Fragment)         | 106.95 | #N/A   | 2 | 0 | 1.08 | 0.00 | 0.54 | 0.77 |
| Q09167 SRSF5_RAT | 30891 | Serine/arginine-rich splicing factor 5   | 75.11  | #N/A   | 2 | 0 | 1.10 | 0.00 | 0.55 | 0.78 |
| P04639 APOA1_RAT | 30062 | Apolipoprotein A-I                       | 174.19 | 153.68 | 7 | 7 | 3.96 | 4.64 | 4.30 | 0.48 |

|                  |       |                                        |        |        |   |   |      |      |      |      |
|------------------|-------|----------------------------------------|--------|--------|---|---|------|------|------|------|
| Q6PDU1 SRSF2_RAT | 25476 | Serine/arginine-rich splicing factor 2 | 43.68  | #N/A   | 1 | 0 | 0.67 | 0.00 | 0.33 | 0.47 |
| P48032 TIMP3_RAT | 24226 | Metalloproteinase inhibitor 3          | 32.88  | #N/A   | 1 | 0 | 0.70 | 0.00 | 0.35 | 0.50 |
| Q62740 SPP24_RAT | 23170 | Secreted phosphoprotein 24             | 184.02 | 153.51 | 7 | 6 | 5.14 | 5.16 | 5.15 | 0.01 |
| P11517 HBB2_RAT  | 15982 | Hemoglobin subunit beta-2              | 192.54 | #N/A   | 5 | 0 | 5.33 | 0.00 | 2.66 | 3.77 |
| P02091 HBB1_RAT  | 15979 | Hemoglobin subunit beta-1              | 234.1  | 185.57 | 6 | 6 | 6.39 | 7.48 | 6.94 | 0.77 |
| P01946 HBA_RAT   | 15329 | Hemoglobin subunit alpha-1/2           | 143.29 | 119.8  | 7 | 7 | 7.78 | 9.10 | 8.44 | 0.93 |
| P08494 MGP_RAT   | 12037 | Matrix Gla protein                     | 108.16 | 97.78  | 2 | 2 | 2.83 | 3.31 | 3.07 | 0.34 |
| P04638 APOA2_RAT | 11439 | Apolipoprotein A-II                    | 139.01 | 113.14 | 3 | 3 | 4.47 | 5.22 | 4.85 | 0.53 |

**Table S3** List of all prominent proteins identified in the hard corona associated with negatively charged SPIONs *in vivo*.

| Accession       | Mass (Da) | Protein               | -10lgP   |          | # Spectra |          | NpSpC    |          | Average NpSpC | SD (±) |
|-----------------|-----------|-----------------------|----------|----------|-----------|----------|----------|----------|---------------|--------|
|                 |           |                       | Sample 1 | Sample 2 | Sample 1  | Sample 2 | Sample 1 | Sample 2 |               |        |
| P04937 FINC_RAT | 272509    | Fibronectin           | 130.56   | 146.56   | 8         | 7        | 0.60     | 0.52     | 0.56          | 0.05   |
| Q62812 MYH9_RAT | 226336    | Myosin-9              | 65.71    | 60.28    | 2         | 2        | 0.18     | 0.18     | 0.18          | 0.00   |
| P08649 CO4_RAT  | 192162    | Complement C4         | 120.74   | 128.96   | 3         | 4        | 0.32     | 0.43     | 0.37          | 0.08   |
| P01026 CO3_RAT  | 186459    | Complement C3         | 212.68   | 230.14   | 15        | 16       | 1.64     | 1.75     | 1.70          | 0.08   |
| Q63041 A1M_RAT  | 167124    | Alpha-1-macroglobulin | 69.67    | 68.86    | 2         | 1        | 0.24     | 0.12     | 0.18          | 0.09   |
| Q03626 MUG1_RAT | 165325    | Murinoglobulin-1      | 70.89    | 76.66    | 2         | 2        | 0.25     | 0.25     | 0.25          | 0.00   |
| P14046 A1I3_RAT | 163772    | Alpha-1-inhibitor 3   | 70.89    | 76.66    | 2         | 2        | 0.25     | 0.25     | 0.25          | 0.00   |
| Q61E52 MUG2_RAT | 161588    | Murinoglobulin-2      | 70.89    | 76.66    | 2         | 2        | 0.25     | 0.25     | 0.25          | 0.00   |

|                  |       |                                              |        |        |    |    |      |      |      |      |
|------------------|-------|----------------------------------------------|--------|--------|----|----|------|------|------|------|
| Q63416 ITIH3_RAT | 99098 | Inter-alpha-trypsin inhibitor heavy chain H3 | 31.04  | 35.01  | 1  | 1  | 0.21 | 0.21 | 0.21 | 0.00 |
| Q9R0T4 CADH1_RAT | 98715 | Cadherin-1                                   | 58.01  | 52.03  | 2  | 2  | 0.41 | 0.41 | 0.41 | 0.00 |
| P06399 FIBA_RAT  | 86686 | Fibrinogen alpha chain                       | 202.83 | 204.36 | 18 | 18 | 4.24 | 4.24 | 4.24 | 0.00 |
| Q63772 GAS6_RAT  | 74638 | Growth arrest-specific protein 6             | 111.18 | 110.61 | 3  | 3  | 0.82 | 0.82 | 0.82 | 0.00 |
| P53813 PROS_RAT  | 74627 | Vitamin K-dependent protein S                | 106.09 | 109.62 | 3  | 3  | 0.82 | 0.82 | 0.82 | 0.00 |
| P18292 THRB_RAT  | 70412 | Prothrombin                                  | 56.88  | 61.37  | 1  | 1  | 0.29 | 0.29 | 0.29 | 0.00 |
| P02770 ALBU_RAT  | 68731 | Serum albumin                                | 150.42 | 171.2  | 6  | 6  | 1.78 | 1.78 | 1.78 | 0.00 |
| Q62894 ECM1_RAT  | 63249 | Extracellular matrix protein 1               | 44.81  | 44.49  | 1  | 1  | 0.32 | 0.32 | 0.32 | 0.00 |
| Q62930 CO9_RAT   | 62281 | Complement component C9                      | 103.72 | 105.21 | 2  | 2  | 0.66 | 0.66 | 0.66 | 0.00 |
| Q71RP1 HPSE_RAT  | 60480 | Heparanase                                   | 136.75 | 144.71 | 5  | 5  | 1.69 | 1.69 | 1.69 | 0.00 |

|                 |       |                                    |        |        |    |    |      |      |      |      |
|-----------------|-------|------------------------------------|--------|--------|----|----|------|------|------|------|
| P82450 SIAE_RAT | 60466 | Sialate O-acetyltransferase        | 37.88  | 42.09  | 1  | 1  | 0.34 | 0.34 | 0.34 | 0.00 |
| Q9EPH1 A1BG_RAT | 56479 | Alpha-1B-glycoprotein              | 92     | 93.17  | 4  | 3  | 1.45 | 1.09 | 1.27 | 0.26 |
| P07867 LIPC_RAT | 55623 | Hepatic triacylglycerol lipase     | 72.21  | 69.21  | 3  | 2  | 1.10 | 0.73 | 0.92 | 0.26 |
| Q68FR2 BIN2_RAT | 55118 | Bridging integrator 2              | 62.98  | 71.28  | 1  | 1  | 0.37 | 0.37 | 0.37 | 0.00 |
| Q63207 FA10_RAT | 54265 | Coagulation factor X               | 218.7  | 221.42 | 15 | 15 | 5.65 | 5.65 | 5.65 | 0.00 |
| P14480 FIBB_RAT | 54235 | Fibrinogen beta chain              | 153.31 | 162.31 | 6  | 6  | 2.26 | 2.26 | 2.26 | 0.00 |
| Q63313 LBP_RAT  | 53600 | Lipopolysaccharide-binding protein | ND     | 58.71  | 0  | 2  | 0.00 | 0.76 | 0.38 | 0.54 |
| Q06000 LIPL_RAT | 53082 | Lipoprotein lipase                 | ND     | 44.66  | 0  | 2  | 0.00 | 0.77 | 0.38 | 0.54 |
| P31394 PROC_RAT | 51912 | Vitamin K-dependent protein C      | 62.69  | 65.43  | 1  | 1  | 0.39 | 0.39 | 0.39 | 0.00 |
| P02680 FIBG_RAT | 50633 | Fibrinogen gamma chain             | 137.15 | 143.4  | 5  | 5  | 2.02 | 2.02 | 2.02 | 0.00 |

|                  |       |                                                        |        |        |    |    |      |      |      |      |
|------------------|-------|--------------------------------------------------------|--------|--------|----|----|------|------|------|------|
| Q8K3U6 FA7_RAT   | 50399 | Coagulation factor VII                                 | 111.45 | 119.2  | 4  | 4  | 1.62 | 1.62 | 1.62 | 0.00 |
| Q9R0I8 PI42A_RAT | 46210 | Phosphatidylinositol 5-phosphate 4-kinase type-2 alpha | 69.79  | 74.68  | 1  | 1  | 0.44 | 0.44 | 0.44 | 0.00 |
| P02651 APOA4_RAT | 44456 | Apolipoprotein A-IV                                    | 37.76  | 35.02  | 1  | 1  | 0.46 | 0.46 | 0.46 | 0.00 |
| P24090 FETUA_RAT | 37982 | Alpha-2-HS-glycoprotein                                | 128.83 | 134.85 | 2  | 2  | 1.08 | 1.08 | 1.08 | 0.00 |
| Q9WTS8 FCN1_RAT  | 36627 | Ficolin-1                                              | 199.66 | 204.3  | 9  | 9  | 5.02 | 5.02 | 5.02 | 0.00 |
| P04797 G3P_RAT   | 35828 | Glyceraldehyde-3-phosphate dehydrogenase               | 122.73 | 125.71 | 7  | 7  | 3.99 | 3.99 | 3.99 | 0.00 |
| P02650 APOE_RAT  | 35753 | Apolipoprotein E                                       | 182.71 | 194.95 | 10 | 10 | 5.72 | 5.72 | 5.72 | 0.00 |
| P08721 OSTP_RAT  | 34963 | Osteopontin                                            | 74.84  | 74.38  | 2  | 2  | 1.17 | 1.17 | 1.17 | 0.00 |
| P57756 FCN2_RAT  | 34684 | Ficolin-2                                              | 30.87  | 33.52  | 1  | 1  | 0.59 | 0.59 | 0.59 | 0.00 |
| P16296 FA9_RAT   | 31447 | Coagulation factor IX (Fragment)                       | 117.58 | 115.43 | 3  | 3  | 1.95 | 1.95 | 1.95 | 0.00 |

|                  |       |                                              |        |        |   |   |       |       |       |      |
|------------------|-------|----------------------------------------------|--------|--------|---|---|-------|-------|-------|------|
| Q09167 SRSF5_RAT | 30891 | Serine/arginine-rich splicing factor 5       | 58.77  | 66.1   | 1 | 1 | 0.66  | 0.66  | 0.66  | 0.00 |
| P24594 IBP5_RAT  | 30298 | Insulin-like growth factor-binding protein 5 | 32.89  | 36.87  | 1 | 1 | 0.67  | 0.67  | 0.67  | 0.00 |
| P04639 APOA1_RAT | 30062 | Apolipoprotein A-I                           | 86.9   | 79.94  | 2 | 2 | 1.36  | 1.36  | 1.36  | 0.00 |
| P23680 SAMP_RAT  | 26176 | Serum amyloid P-component                    | 31.66  | ND     | 1 | 0 | 0.78  | 0.00  | 0.39  | 0.55 |
| P00762 TRY1_RAT  | 25959 | Anionic trypsin-1                            | 40.92  | 41.73  | 1 | 1 | 0.79  | 0.79  | 0.79  | 0.00 |
| P48199 CRP_RAT   | 25468 | C-reactive protein                           | 44.39  | 58.64  | 1 | 1 | 0.80  | 0.80  | 0.80  | 0.00 |
| P48032 TIMP3_RAT | 24226 | Metalloproteinase inhibitor 3                | 104.52 | 108.27 | 3 | 3 | 2.53  | 2.53  | 2.53  | 0.00 |
| Q62740 SPP24_RAT | 23170 | Secreted phosphoprotein 24                   | 149.77 | 160.3  | 5 | 5 | 4.41  | 4.41  | 4.41  | 0.00 |
| P11517 HBB2_RAT  | 15982 | Hemoglobin subunit beta-2                    | 193.09 | 198.74 | 8 | 8 | 10.23 | 10.23 | 10.23 | 0.00 |
| P02091 HBB1_RAT  | 15979 | Hemoglobin subunit beta-1                    | 221.75 | 228.01 | 7 | 7 | 8.96  | 8.95  | 8.95  | 0.00 |



|                  |       |                              |        |        |   |   |      |      |      |      |
|------------------|-------|------------------------------|--------|--------|---|---|------|------|------|------|
| P01946 HBA_RAT   | 15329 | Hemoglobin subunit alpha-1/2 | 149.41 | 169.86 | 7 | 7 | 9.33 | 9.33 | 9.33 | 0.00 |
| P08494 MGP_RAT   | 12037 | Matrix Gla protein           | 74.53  | 82.87  | 1 | 1 | 1.70 | 1.70 | 1.70 | 0.00 |
| P04638 APOA2_RAT | 11439 | Apolipoprotein A-II          | 124.7  | 126.94 | 4 | 4 | 7.15 | 7.15 | 7.15 | 0.00 |
